# Supplementary material
Source: MDPI journal article supplement (https://www.mdpi.com/1999-4907/14/1/157)
Supplement: s1 [file s1 › forests-2137621-supplementary.pdf]

**Supplementary Table S1.** Proportion of genetic variation between post-fire natural old-growth (PF-OG) and post-fire natural young regeneration (PF-YR) population groups, and among and within populations of white spruce from hierarchical AMOVA.

| Source                                    | df  | SS       | MS     | Estimated Variance | % Variance |
|-------------------------------------------|-----|----------|--------|--------------------|------------|
| Between PF-OG and PF-YR population groups | 1   | 19.568   | 19.568 | 0.005              | 0          |
| Among populations                         | 2   | 38.547   | 19.273 | 0.363              | 4          |
| Within populations                        | 114 | 978.598  | 8.584  | 8.584              | 96         |
| Total                                     | 117 | 1036.712 |        | 8.952              | 100        |
